# Supplementary material for: CFO Gender, Corporate Risk-Taking, and Information Disclosure Violations
Source: Frontiers journal article supplement (doi:10.3389/fpsyg.2022.902472), 2022-07-13
Supplement: Table_1.pdf [file Table_1.pdf]

## Appendix A Variable definitions

| Variable                    | Description                                                                                                                                                                                                                                                                                                                                        |
|-----------------------------|----------------------------------------------------------------------------------------------------------------------------------------------------------------------------------------------------------------------------------------------------------------------------------------------------------------------------------------------------|
| <b>Dependent Variables</b>  |                                                                                                                                                                                                                                                                                                                                                    |
| Violation                   | An indicator variable equals to 1 if the firm has information disclosure violation in year t, and 0 otherwise.                                                                                                                                                                                                                                     |
| Number                      | Total number of information disclosure violations which firm has in year t.                                                                                                                                                                                                                                                                        |
| False                       | An indicator variable equals to 1 if the firm has false information disclosure violation in year t, and 0 otherwise. False violation means that CFO discloses false or misleading statements about a company (including false or misleading CSRC reports or financial statements).                                                                 |
| Improper                    | An indicator variable equals to 1 if the firm has improper information disclosure violation in year t, and 0 otherwise. Improper violation relates to not disclose information on time, or disclose information which involve material omission or use accounting discretion improperly.                                                           |
| <b>Independent variable</b> |                                                                                                                                                                                                                                                                                                                                                    |
| Gender                      | An indicator variable equals to 1 if the CFO is female and 0 otherwise.                                                                                                                                                                                                                                                                            |
| <b>Control variables</b>    |                                                                                                                                                                                                                                                                                                                                                    |
| Size                        | Natural log of the total book value of assets                                                                                                                                                                                                                                                                                                      |
| Lev                         | Long-term liabilities divided by total assets                                                                                                                                                                                                                                                                                                      |
| ROE                         | Total income before extraordinary items divided by total assets                                                                                                                                                                                                                                                                                    |
| Loss                        | An indicator variable equals to 1 if the firm's net income is below 0, and 0 otherwise.                                                                                                                                                                                                                                                            |
| Tobin' Q                    | Market value of equity plus book value of total liability, then divided by total assets                                                                                                                                                                                                                                                            |
| SOE                         | An indicator variable equals to 1 if the firm is ultimately controlled by the government, and 0 otherwise.                                                                                                                                                                                                                                         |
| List                        | The natural log of list year of the firm.                                                                                                                                                                                                                                                                                                          |
| Big4                        | An indicator variable equals to 1 if the firm's financial report is audited by the big 4 audit firms and 0 otherwise.                                                                                                                                                                                                                              |
| Board                       | The number of the board directors                                                                                                                                                                                                                                                                                                                  |
| Indep                       | Number of independent directors divided by the board size                                                                                                                                                                                                                                                                                          |
| Duality                     | An indicator variable equals to 1 if the COB and CEO are the same person, and 0 otherwise.                                                                                                                                                                                                                                                         |
| Age                         | Natural log of the age of CFO                                                                                                                                                                                                                                                                                                                      |
| Tenure                      | Natural log of the monthly tenure of CFO                                                                                                                                                                                                                                                                                                           |
| Degree                      | An indicator variable equals to 1 if the CFO has a master's or doctoral degree, and 0 otherwise.                                                                                                                                                                                                                                                   |
| Major                       | An indicator variable equals to 1 if the CFO's major is accounting or finance in college, and 0 otherwise.                                                                                                                                                                                                                                         |
| Abroad                      | An indicator variable equals to 1 if the CFO has studied or worked abroad before and 0 otherwise.                                                                                                                                                                                                                                                  |
| PC                          | An indicator variable equals to 1 if the CFO has past or concurrent work experience in the government or a political appointment, for example, a People's Representative or a Member of Chinese People's Political Consultative Conference is accounting or finance. Otherwise it is 0.                                                            |
| Year                        | Year dummies                                                                                                                                                                                                                                                                                                                                       |
| Industry                    | Industry dummies                                                                                                                                                                                                                                                                                                                                   |
| <b>Further analysis</b>     |                                                                                                                                                                                                                                                                                                                                                    |
| Post                        | An indicator variable equals to 1 if the year is after the transition of a CFO, and 0 otherwise.                                                                                                                                                                                                                                                   |
| Up                          | An indicator variable equals to 1 if the transition if from a male CFO to a female CFO, and 0 otherwise.                                                                                                                                                                                                                                           |
| Down                        | An indicator variable equals to 1 if the transition if from a female CFO to a male CFO, and 0 otherwise.                                                                                                                                                                                                                                           |
| Power                       | An indicator variable equals to 1 if the CFO has high power and 0 if she has low power. The personal power of a CFO is measured by <i>Direct</i> , <i>Dcomp</i> , <i>Dshare</i> , <i>Dtenure</i> , <i>Dboard</i> , and <i>Dedu</i> . If one of the above measures equals 1, <i>Power</i> is also 1. If the 6 measure are 0, <i>Power</i> equals 0. |

|                 |                                                                                                                                                                                                                                                                                                                                                                             |
|-----------------|-----------------------------------------------------------------------------------------------------------------------------------------------------------------------------------------------------------------------------------------------------------------------------------------------------------------------------------------------------------------------------|
| Direct          | An indicator variable equals to 1 if the CFO is also the director of the board, and 0 otherwise.                                                                                                                                                                                                                                                                            |
| Dcomp           | An indicator variable equals to 1 if the CFO's total compensation (including salary, bonus, stock grants, and stock options) is higher than the industry-year median, and 0 otherwise.                                                                                                                                                                                      |
| Dshare          | An indicator variable equals to 1 if the CFO holds the outstanding share of the firm, and 0 otherwise.                                                                                                                                                                                                                                                                      |
| Dtenure         | An indicator variable equals to 1 if the tenure of CFO is longer than the industry-year median, and 0 otherwise.                                                                                                                                                                                                                                                            |
| Dboard          | An indicator variable equals to 1 if the CFO holds directorates on other corporate boards, and 0 otherwise.                                                                                                                                                                                                                                                                 |
| Dedu            | An indicator variable equals to 1 if the CFO holds a master's or doctoral degree, and 0 otherwise.                                                                                                                                                                                                                                                                          |
| Gover           | An indicator variable equals to 1 if the firm has high external monitoring and 0 if it has low monitoring. The external monitoring of a firm is measured by <i>Dinst</i> , <i>Daudit</i> , <i>Danalyst</i> , <i>Dmedia</i> , <i>DMI</i> , and <i>Dtrust</i> . If one of the above measures equals 1, <i>Gover</i> is also 1. If the 6 measure are 0, <i>Gover</i> equals 0. |
| Dinst           | An indicator variable equals to 1 if the institutional investors' shareholding is greater than the industry-year median, and 0 otherwise.                                                                                                                                                                                                                                   |
| <i>Daudit</i> , | An indicator variable equals to 1 if the financial report is audited by the big 4 auditor firms, and 0 otherwise.                                                                                                                                                                                                                                                           |
| <i>Danalyst</i> | An indicator variable equals to 1 if the number of analysts who follow the firm is greater than the industry-year median, and 0 otherwise.                                                                                                                                                                                                                                  |
| <i>Dmedia</i>   | An indicator variable equals to 1 if the firm's media coverage is greater than the industry-year median, and 0 otherwise.                                                                                                                                                                                                                                                   |
| <i>DMI</i>      | An indicator variable equals to 1 if the marketization index ( <i>MI</i> ) of the province where firm locate is greater than the province-year median, and 0 otherwise.                                                                                                                                                                                                     |
| <i>Dtrust</i>   | An indicator variable equals to 1 if social trust index of the province where firm locate is greater than the province-year median, and 0 otherwise.                                                                                                                                                                                                                        |

### Appendix B Industry-year distribution of the sample

| industry                                                               | 2003 | 2004 | 2005  | 2006  | 2007  | 2008  | 2009  | 2010  | 2011  | 2012  | 2013  | 2014  | 2015  | 2016  | Total  |
|------------------------------------------------------------------------|------|------|-------|-------|-------|-------|-------|-------|-------|-------|-------|-------|-------|-------|--------|
| Agriculture, hunting, forestry, fishing                                | 18   | 20   | 21    | 23    | 26    | 26    | 26    | 33    | 33    | 38    | 39    | 39    | 38    | 38    | 418    |
| Mining                                                                 | 12   | 14   | 15    | 14    | 17    | 28    | 28    | 30    | 40    | 46    | 52    | 47    | 49    | 48    | 440    |
| Manufacturing                                                          | 474  | 550  | 599   | 603   | 618   | 667   | 684   | 765   | 982   | 1138  | 1231  | 1211  | 1245  | 1355  | 12122  |
| Production and supply of electricity, heat, gas and water              | 34   | 37   | 40    | 44    | 47    | 48    | 51    | 51    | 57    | 60    | 58    | 56    | 56    | 56    | 695    |
| Construction                                                           | 15   | 18   | 17    | 20    | 27    | 30    | 31    | 30    | 33    | 42    | 46    | 43    | 44    | 48    | 444    |
| Transportation, warehousing and postal services                        | 36   | 38   | 43    | 39    | 46    | 45    | 44    | 42    | 48    | 58    | 59    | 61    | 60    | 64    | 683    |
| Information transmission, software and information technology services | 49   | 55   | 66    | 70    | 75    | 73    | 78    | 95    | 114   | 148   | 172   | 175   | 178   | 213   | 1,561  |
| Wholesale and retail                                                   | 58   | 61   | 72    | 73    | 80    | 82    | 82    | 101   | 107   | 124   | 125   | 117   | 121   | 129   | 1,332  |
| Real estate                                                            | 40   | 39   | 44    | 43    | 47    | 59    | 70    | 81    | 91    | 92    | 96    | 98    | 103   | 92    | 995    |
| Social Services                                                        | 29   | 28   | 28    | 31    | 34    | 34    | 33    | 44    | 50    | 54    | 64    | 61    | 67    | 71    | 628    |
| Communication and Cultural Industries                                  | 9    | 9    | 8     | 6     | 7     | 8     | 9     | 7     | 19    | 25    | 33    | 30    | 33    | 37    | 240    |
| Comprehensive                                                          | 60   | 70   | 62    | 53    | 57    | 49    | 49    | 56    | 39    | 40    | 40    | 41    | 38    | 46    | 700    |
| Total                                                                  | 834  | 939  | 1,015 | 1,019 | 1,081 | 1,149 | 1,185 | 1,335 | 1,613 | 1,865 | 2,015 | 1,979 | 2,032 | 2,197 | 20,258 |

Industries are classified according to the code of China Securities Regulatory Commission (CSRC), edition 2001.
